# Supplementary material for: Copper sulfide in a vesicular basalt reveals aqueous liquid on the Moon
Source: Research Square preprint supplement (doi:10.21203/rs.3.rs-2649595/v1), 2023-04-04
Supplement: Supplementary file 1 [file 6aa75b4a43d655bb06fab872.xlsx]

## Sheet: Sheet1
Table S4.	Porosity and connectivity analyses using CT data
Void space abundance
Subvolume	Total Volume (mm3)	Void Space Volume (mm3)	Void Space Volume Abundance (%)
1	68235.9	23232	34.0466
2	48351	15591	32.2455
3	21448	6993	32.6044
4	20811	7006	33.6649
5	47604	15116	31.7536
6	36293	12217	33.6621
7	11329.6	3817.6	33.6958
Mean	36296.1	11996.1	33.0961
Min	11329.6	3817.6	31.7536
Max	68235.9	23232	34.0466
Connected Component Analysis
Total Volume (mm3)	Void Space Volume (mm3)	Void Space Volume Abundance (%)	Volume of 10 largest connected components (mm3)	% of total void space (10 largest)	Volume of single largest connected vesicle component (mm3)	% of total void space (largest)
11329.6	3817.6	33.6958	2673.4	70.0283	1642.32	43.0197
