# Supplementary material for: Copper sulfide in a vesicular basalt reveals aqueous liquid on the Moon
Source: Research Square preprint supplement (doi:10.21203/rs.3.rs-2649595/v1), 2023-04-04
Supplement: Supplementary file 2 [file 96269b18609505d75e4b24f6.xlsx]

## Sheet: Sheet1
Table S2. EDS data of Cu-S in Fig. 1E
massive aggregates
Atomic %	5 kV	8kV	8kV	10kv
Cu	58.5782	59.3424	60.5461	61.0311
S	41.4218	40.6576	39.4539	38.9689
Cu/S	1.41419	1.45956	1.53461	1.56615
cluster
Atomic %	5 kV	8kV	8kV	8kV	8kV	10kv
Si	0.946708	0	1.50563	0.859325	2.42275	2.07916
S	35.6771	34.885	35.3986	31.9223	39.8759	35.6237
Fe	0	1.86408	2.04723	3.29938	3.54635	3.02424
Cu	63.3762	63.251	61.0485	63.9189	54.155	59.2728
Cu/S	1.77639	1.81313	1.7246	2.00233	1.35809	1.66386
