# Supplementary material for: Copper sulfide in a vesicular basalt reveals aqueous liquid on the Moon
Source: Research Square preprint supplement (doi:10.21203/rs.3.rs-2649595/v1), 2023-04-04
Supplement: Supplementary file 3 [file f1b31e8b3abc03f0636be046.xlsx]

## Sheet: Table S3
	Table S1. EPMA data of Fe metal and troilite
		Fe metal chemistry in thin section																											Troilite chemistry in polished thin section
d.l.	Element	Fe in rock troilite						Irregular Fe metal grains in the rock matrix and on walls													Fe in wall FeS									rock troilite				wall troilite					wall troilite
wt%	wt%	Fig. S4B																			fig. S3A								wt%	fig. S4B				no metal					fig. S3A						Avg	Wall troilite in chips
		EPMA	EDS	rel%	EPMA	EDS	rel%	EPMA			EDS	rel%	EPMA			EDS	rel%	EPMA	EDS	rel%	EPMA					EDS	rel%			EPMA		EDS	rel%	EPMA			EDS	rel%	EPMA		EDS		rel%		EPMA	EDS	rel%	EDS	rel%
0.03	Fe	98.8862	99.748	0.00871486	98.7057	100	0.0131131	93.2078	94.2105	94.0387	94.68	0.00678012	94.2976	93.1431	93.0273	93.4646	-0.0107882	89.6055	90.3096	-0.00779618	83.0778	86.9229	87.0938	86.4485	85.2675	83.6334	-0.0344964		Fe	62.2928	62.4325	63.8039	0.016398	62.413	61.9915	61.658	63.9808	0.0236113	62.6867	62.4721	64.3333	64.4724	0.0145804		62.2443	64	0.0213986	64.5	0.0293782
0.04	Cu	bd			bd			0.088988	0.097082	0.082778			0.120193	0.080254	0.071286						0.165073	0.229808	0.294087	0.29408	0.275101				Cu	bd	bd			bd	bd	bd			bd	bd
0.03	Ni	0.088313			0.075268			3.80317	3.69994	3.76895	3.68	-0.0229136	3.9093	4.35951	4.32673	4.13131	-0.0263641	7.07515	7.109	-0.00476223	14.1556	9.98727	9.95531	10.1274	10.8026	13.8517	0.246115		Ni	0.033144	0.033966			0.0266	bd	bd			0.028511	0.025891					0.0270007
0.03	Co	0.44959			0.458193			1.16129	1.1024	1.14803	1.64	0.438662	1.14538	1.19085	1.17043	2.07071	0.752872	2.08544	2.58143	-0.192136	1.92695	1.48749	1.48739	1.50624	1.59326	2.41424	0.49368		Co	0.071002	0.088635	0.688677		0.053297	0.050145	0.061942			0.112499	0.100242					0.075625
0.01	S	0.134447	0.161274		0.113039			bd	bd	bd			bd	bd	bd			bd			0.031317	0.203324	0.1971	0.226241	0.819561				S	36.86	36.8241	35.4061	-0.0452828	36.9639	37.08	36.8266	36.0293	-0.0326483	36.7644	36.7608	35.4343	35.4466	-0.029027		36.8791	35.7	-0.0383828	35.5	-0.04377
0.02	Ti	bd			bd			na	na	na			na	na	na			na			0.020685	0.054603	0.057842	0.070157	0.181167				Ti	0.01596	bd			0.01963	0.023398	bd			0.027739	0.034147	0.232323				0.0262285
0.02	Si	0.057259	0.100796		0.029984			na	na	na			na	na	na			na			0.035927	bd	bd	0.015825	0.027018	0.110653			Si	bd	0.035485			0.018762	0.034925	0.454412			bd	bd					0.169366	0.31
	Total	99.6158	100		99.3821			98.2612	99.1099	99.0385	99.0385		99.4725	98.7737	98.5957	99.6667		98.7661	100		99.4133	98.8854	99.0855	98.6884	98.9663	100.01			Total	99.2729	99.4147	100		99.4952	99.18	99.0009	100		99.6198	99.3931	100	99.919			99.3378	100		100
																													Fe/S	0.965706	0.968813	1.02975	0.0646043	0.96485	0.955332	0.956731	1.01474	0.026712	0.974339	0.971098	1.03747	1.03935	0.0675296		0.964452	1.02441	0.0621675	1.03823	0.0764965
	d.l. Limite of detection based on counting statistics
	bd: below detection
	na: not analyzed
	percent error: uncertainty in the elemental wt%
[truncated: 2 more columns]
