# Supplementary material for: Copper sulfide in a vesicular basalt reveals aqueous liquid on the Moon
Source: Research Square preprint supplement (doi:10.21203/rs.3.rs-2649595/v1), 2023-04-04
Supplement: Supplementary file 4 [file fbd0b7ca26b67e453c67ada3.xlsx]

## Sheet: Table S1
Table S1. EPMA data of Fe metal and troilite
		Fe metal chemistry																																				Troilite chemistry
d.l.	Element	Fe in rock troilite				Irregular Fe metal grains in the rock matrix and on walls															Fe in wall FeS																		rock troilite		wall troilite
wt%	wt%	fig. S4B		Other		fig. S4C						Others									fig. S3A					fig. S3B									fig. S3C			wt%	fig. S4B		irr. Pore	no metal			fig. S3A		fig. S3B
0.03	Fe	98.8862	98.7057	95.9628		89.7689	89.9478	91.345	91.0743	90.9422	92.7779	92.5727	93.2078	94.2105	94.0387	94.2976	93.1431	93.0273	89.6055		83.0778	86.9229	87.0938	86.4485	85.2675	83.8135	84.7864	83.5955	83.6675	83.7125	83.6867	85.0097	84.0408	82.7463	85.7353	85.1196		Fe	62.2928	62.4325	62.0178	62.413	61.9915	61.658	62.6867	62.4721	61.7584	62.2186	61.9619
0.04	Cu	bd	bd	bd		0.097773	0.104786	0.135744	0.072847	0.088636	0.11998	0.08307	0.088988	0.097082	0.082778	0.120193	0.080254	0.071286			0.165073	0.229808	0.294087	0.29408	0.275101	0.211013	0.220435	0.22619	0.243644	0.271131	0.239922	0.250856	0.228072	0.236367	0.273748	0.244346		Cu	bd	bd	bd	bd	bd	bd	bd	bd	bd	bd	bd
0.03	Ni	0.088313	0.075268	0.192512		6.40723	6.48924	6.55891	6.8281	6.29931	5.44006	5.43285	3.80317	3.69994	3.76895	3.9093	4.35951	4.32673	7.07515		14.1556	9.98727	9.95531	10.1274	10.8026	11.6688	10.5815	12.4594	11.3736	11.7905	11.3522	10.3071	12.3624	13.0641	10.5009	10.6513		Ni	0.033144	0.033966	bd	0.0266	bd	bd	0.028511	0.025891	0.026606	bd	0.129643
0.03	Co	0.44959	0.458193	0.738085		1.54682	1.56139	1.56291	1.54986	1.56171	1.36256	1.31097	1.16129	1.1024	1.14803	1.14538	1.19085	1.17043	2.08544		1.92695	1.48749	1.48739	1.50624	1.59326	2.06962	1.98247	2.18872	2.07693	2.13508	2.03824	1.50139	1.60838	1.6647	1.55401	1.5123		Co	0.071002	0.088635	0.044243	0.053297	0.050145	0.061942	0.112499	0.100242	0.049621	0.087137	0.103645
0.01	S	0.134447	0.113039	0.082518		bd	bd	bd	bd	0.014325	bd	bd	bd	bd	bd	bd	bd	bd	bd		0.031317	0.203324	0.1971	0.226241	0.819561	0.080572	0.182547	0.07129	0.071478	0.0564	0.068483	0.245465	0.099854	0.094251	0.144412	0.091365		S	36.86	36.8241	37.0152	36.9639	37.08	36.8266	36.7644	36.7608	37.2321	37.3568	35.9304
0.02	Ti	bd	bd	na		0.174577	0.19114	0.028993	0.034324	0.246543	bd	bd	na	na	na	na	na	na	na		0.020685	0.054603	0.057842	0.070157	0.181167	0.645911	0.535689	0.224116	0.193751	0.170114	0.030284	0.050537	0.057315	0.065725	0.06699	0.311244		Ti	0.01596	bd	bd	0.01963	0.023398	bd	0.027739	0.034147	0.219452	0.214245	0.427948
0.02	Si	0.057259	0.029984	na		0.126043	0.097926	0.045162	0.077663	bd	0.039764	0.03166	na	na	na	na	na	na	na		0.035927	bd	bd	0.015825	0.027018	bd	bd	0.033728	0.035127	0.025342	0.034232	0.022937	bd	0.024969	0.029501	0.02088		Si	bd	0.035485	0.021223	0.018762	0.034925	0.454412	bd	bd	bd	0.023103	bd
	Total	99.6158	99.3821	96.9759		98.1213	98.3923	99.6767	99.6371	99.1527	99.7403	99.4312	98.2612	99.1099	99.0385	99.4725	98.7737	98.5957	98.7661		99.4133	98.8854	99.0855	98.6884	98.9663	98.4895	98.289	98.7989	97.6621	98.161	97.4501	97.388	98.3969	97.8964	98.3049	97.9511		Total	99.2729	99.4147	99.0985	99.4952	99.18	99.0009	99.6198	99.3931	99.2861	99.8999	98.5535
	Percent error in element wt%																																					Percent error
	Fe	0.181308	0.18135	0.184173		0.189552	0.1894	0.187835	0.188136	0.18813	0.186557	0.186552	0.186245	0.185239	0.18549	0.185122	0.186308	0.18638	0.189818		0.196111	0.192216	0.192194	0.192723	0.194133	0.195622	0.194649	0.195782	0.195781	0.195384	0.19578	0.19449	0.195218	0.196671	0.193553	0.194275		Fe	0.235183	0.235083	0.235649	0.235203	0.236209	0.236832	0.234748	0.235138	0.236632	0.235893	0.23626
	Cu					22.4669	20.5527	16.0865	30.4165	24.6246	18.3377	25.6575	22.7857	20.8735	24.4262	16.8135	25.0833	28.4557	64.1818		13.8575	10.0982	8.00748	7.91625	8.60314	11.022	10.5667	10.2506	9.66769	8.55792	9.55199	9.30161	10.0625	9.72477	8.44666	9.49153		Cu
	Ni	19.1085	21.9752	8.92631		0.786739	0.78222	0.77579	0.759872	0.793082	0.863505	0.863973	1.0389	1.05747	1.04728	1.02373	0.957454	0.964595	0.738341		0.515176	0.619053	0.620153	0.614198	0.593742	0.570693	0.601242	0.550542	0.577406	0.565736	0.578615	0.609337	0.552498	0.536686	0.603224	0.598217		Ni	45.8441	44.5078		56.2187	67.9686		53.1004	58.597	56.7792		12.5024
	Co	3.97985	3.90304	2.79513		1.66656	1.6654	1.64458	1.65936	1.65971	1.79612	1.84197	2.02424	2.09577	2.0391	2.03314	1.97991	1.99429	1.38387		1.46781	1.70885	1.71012	1.70257	1.63294	1.39309	1.43072	1.35458	1.39081	1.36265	1.41323	1.70627	1.62524	1.59123	1.65507	1.69701		Co	19.5116	15.8008	31.7276	26.3793	27.5644	22.6203	12.3383	14.0162	27.8096	16.2376	13.7897
	S	6.89346	8.02753	10.4015																	24.3078	5.254	5.30286	4.84883	2.2124	10.9637	5.77177	11.8776	11.9108	14.6392	12.0732	4.63005	8.8113	9.35267	6.60935	10.16		S	0.294351	0.294658	0.293585	0.294124	0.293802	0.295081	0.295142	0.295083	0.293108	0.292898	0.298737
	Ti					4.60602	4.2429	24.9396	21.3369	3.45554	92.1626										35.1921	13.5133	12.942	10.6984	4.56085	1.63968	1.88133	3.74134	4.21807	4.74628	24.1506	14.5573	12.9374	11.5606	11.1409	2.86473		Ti	46.1755			37.884	31.9773		27.6223	21.8916	4.04564	4.04396	2.30168
	Si	20.6191	39.7105			10.0083	12.9838	27.0757	15.648	94.4596	30.4815	38.1585									33.9133			78.1842	44.6092			34.3797	34.3316	48.3532	35.3033	52.2317		47.5478	39.9133	56.7132		Si		29.5199	47.5001	54.4393	29.3682	3.26644				42.6351
	atomic%																																					atomic%
	Fe	99.1348	99.2202	98.914		91.7279	91.6839	91.9966	91.7243	92.0188	93.3022	93.3811	95.1054	95.2985	95.1898	95.0598	94.5715	94.606	91.0987		84.2025	88.2832	88.274	87.9658	86.1398	85.5599	86.6433	85.1514	86.1761	85.8268	86.4083	87.6484	85.944	85.087	87.6409	87.3354		Fe	49.187	49.2442	48.9881	49.1613	48.9106	48.6454	49.4021	49.3142	48.6503	48.7323	49.4543
	Cu					0.087803	0.093868	0.120149	0.064478	0.078819	0.10604	0.073643	0.079798	0.086306	0.073639	0.106485	0.071612	0.063712	0.027825		0.147037	0.205126	0.261959	0.262987	0.244244	0.189311	0.19797	0.202486	0.220545	0.2443	0.217711	0.227306	0.204979	0.213606	0.245929	0.220332		Cu
	Ni	0.084218	0.07197	0.188756		6.22779	6.29193	6.28357	6.54149	6.06306	5.20402	5.21304	3.69136	3.56016	3.62905	3.74871	4.21052	4.18558	6.84228		13.6476	9.64891	9.59816	9.80261	10.3809	11.3311	10.2859	12.0724	11.1434	11.4988	11.1498	10.1088	12.0259	12.7786	10.2109	10.3956		Ni	0.024894	0.025485		0.01993			0.021373	0.019441	0.019937	-0.00422	0.098427
	Co	0.427119	0.436463	0.720946		1.49781	1.50819	1.49163	1.47918	1.49745	1.29851	1.25317	1.12288	1.05674	1.10123	1.09417	1.1458	1.12796	2.00917		1.85077	1.43166	1.4286	1.45242	1.52528	2.00211	1.91981	2.11272	2.02718	2.07438	1.99432	1.46693	1.55867	1.62215	1.50537	1.47041		Co	0.053128	0.066251	0.033117	0.039783	0.037492	0.046311	0.084015	0.074986	0.037042	0.064676	0.078391
	S	0.23476	0.197909	0.148145						0.025245		0.012289	0.000579	-0.00172	0.006309	-0.00913	0.000576	0.016717	0.022006		0.055284	0.359679	0.347948	0.400967	1.44206	0.143258	0.324912	0.12648	0.128229	0.100715	0.123159	0.440805	0.177857	0.168804	0.257117	0.163277		S	50.6932	50.5894	50.9256	50.7117	50.9557	50.6053	50.4637	50.542	51.0845	50.9622	49.9486
	Ti	0.009165	0.015654			0.207983	0.227154	0.034045	0.040305	0.29085	0.009162	0.003274									0.024444	0.064659	0.068353	0.083233	0.213385	0.768764	0.638242	0.266162	0.232669	0.203347	0.036457	0.060751	0.068338	0.078797	0.07984	0.372328		Ti	0.014693			0.018027	0.021524		0.025487	0.031427	0.201555	0.195646	0.39823
	Si	0.114141	0.059931			0.256098	0.198476	0.090442	0.155529		0.079515	0.063503									0.072404	0.006711	0.020989	0.032018	0.054273	0.005604	-0.01013	0.068315	0.071941	0.051663	0.070282	0.047024	0.020301	0.051054	0.059965	0.0426		Si	0.016399			0.029386	0.054793	0.712873				0.035981
	Fe/Ni					14.7288	14.5717	14.6408	14.0219	15.177	17.9289	17.913	25.7643	26.768	26.2299	25.358	22.4608	22.6028	13.3141		6.16978	9.14955	9.19697	8.97371	8.29788	7.55089	8.42351	7.05337	7.7334	7.46399	7.74977	8.67055	7.14659	6.65858	8.58309	8.40116		Fe/S	0.970288	0.97341	0.961954	0.969428	0.959865	0.961271	0.978963	0.975706	0.95235	0.956243	0.990105
	d.l. Limite of detection based on counting statistics
	bd: below detection
	na: not analyzed
	percent error: uncertainty in the elemental wt%
[truncated: 16 more columns]
